# Supplementary material
Source: PubMed Central journal article supplement (PMC3585068)
Supplement: supp_M112.431171_jbc.M112.431171-4.pdf [file supp_M112.431171_jbc.M112.431171-4.pdf]

Supplementary Table 1: Synchronized “pyrophosphate synthase” and “diphosphate synthase” query results for prenyltransferase homolog ESTs involved in terpene biosynthesis

| Sequence ID                        | E-value | Homology description                                                                                                         |
|------------------------------------|---------|------------------------------------------------------------------------------------------------------------------------------|
| CL15Contig3                        | 0       | 4-Hydroxy-3-methylbut-2-enyl diphosphate synthase <b>EC(s): 1.17.4.3</b>                                                     |
| CL15Contig2                        | 0       | 4-Hydroxy-3-methylbut-2-en-1-yl diphosphate synthase <b>EC(s): 1.17.4.3</b>                                                  |
| CL15Contig4                        | 0       | 4-Hydroxy-3-methylbut-2-en-1-yl diphosphate synthase <b>EC(s): 1.17.4.3</b>                                                  |
| CL39Contig2                        | 2e-53   | Z,Z-Farnesyl pyrophosphate synthase <b>EC(s): 2.5.1.92</b><br>Z,Z-Neryl diphosphate synthase 1 <b>EC(s): 2.5.1.28</b>        |
| CL1Contig8                         | 1e-175  | E,E-Farnesyl pyrophosphate synthase <b>EC(s): 2.5.1.10</b>                                                                   |
| CL330Contig1                       | 2e-90   | E,E-Geranyl pyrophosphate synthase <b>EC(s): 2.5.1.1</b><br>E,E-Geranylgeranyl pyrophosphate synthase <b>EC(s): 2.5.1.30</b> |
| CL76Contig1                        | 5e-84   | 2-C-Methyl-D-erythritol 2,4-cyclodiphosphate synthase <b>EC(s): 4.6.1.12</b>                                                 |
| CL15Contig5                        | 5e-153  | 4-Hydroxy-3-methylbut-2-enyl diphosphate synthase                                                                            |
| CL2Contig6                         | 2e-90   | (+)-Bornyl diphosphate synthase <b>EC(s): 5.5.1.8</b>                                                                        |
| CL15Contig1                        | 7e-49   | 4-Hydroxy-3-methylbut-2-enyl diphosphate synthase                                                                            |
| CL39Contig1                        | 1e-28   | Dehydrololichyl diphosphate synthase 2 <b>EC(s): 2.5.1.-</b>                                                                 |
| LINFO1NG-RP-013_K24_6MAY2010_086   | 2e-09   | E,E-Geranylgeranyl pyrophosphate synthase 3                                                                                  |
| LINFO2NG-RP-008_D17_07MAY2010_077  | 2e-94   | E,E-Farnesyl pyrophosphate synthase <b>EC(s): 2.5.1.10</b>                                                                   |
| LINFO1NG-RP-008_P10_21APR2010_033  | 2e-14   | E,E-Geranyl pyrophosphate synthase small subunit                                                                             |
| LINFO2NG-RP-012_E15_07MAY2010_060  | 1e-46   | E,E-Geranylgeranyl pyrophosphate synthase <b>EC(s): 2.5.1.30</b>                                                             |
| LINFO1NG-RP-013_L03_6MAY2010_006   | 3e-15   | Dehydrololichyl diphosphate synthase 2 <b>EC(s): 2.5.1.-</b>                                                                 |
| LINFO2NG-RP-010_L06_07MAY2010_021  | 1e-107  | 4-Hydroxy-3-methylbut-2-enyl diphosphate synthase                                                                            |
| LINFO1NG-RP-008_O14_21APR2010_049  | 6e-43   | (E)-4-Hydroxy-3-methylbut-2-enyl diphosphate synthase <b>EC(s): 1.17.4.3</b>                                                 |
| LINFO1NG-RP-013_L23_6MAY2010_086   | 5e-83   | 4-Hydroxy-3-methylbut-2-enyl diphosphate synthase                                                                            |
| LINFO1NG_RP_003_I01_20APR2010_007  | 2e-20   | 4-Hydroxy-3-methylbut-2-enyl diphosphate synthase                                                                            |
| LINFO2NG-RP-014_J11_07MAY2010_040  | 1e-59   | E,E-Farnesyl diphosphate synthase 2                                                                                          |
| LINFO1NG_RP_006_J21_21APR2010_087  | 3e-40   | 4-Hydroxy-3-methylbut-2-enyl diphosphate synthase                                                                            |
| LINFO2NG_UP_1001_L06_18FEB2010_021 | 1e-32   | 4-Hydroxy-3-methylbut-2-enyl diphosphate synthase                                                                            |
| LINFO1NG_RP_005_F08_20APR2010_028  | 4e-43   | Z,Z-Neryl diphosphate synthase 1 <b>EC(s): 2.5.1.28</b>                                                                      |
| LINFO2NG_RP_002_F16_21APR2010_060  | 2e-37   | Copalyl diphosphate synthase                                                                                                 |

Rows shaded in grey contain ‘*cis* prenyltransferase’ homologous candidates identified in the library.
