# Supplementary material
Source: PubMed Central journal article supplement (PMC3585068)
Supplement: supp_M112.431171_jbc.M112.431171-5.pdf [file supp_M112.431171_jbc.M112.431171-5.pdf]

## Legends for supplemental figures

**FIGURE S1.** GC chromatogram of *L. x intermedia* cv Grosso essential oil. Peaks correspond to 1) 1,8-Cineole, 2)  $\beta$ -Ocimen, 3) Camphor, 4) Linalool, 5) Linalool acetate, 6) Terpinen-4-ol, 7) Lavandulyl acetate 8) Menthol – internal standard, 9) iso-Borneol, 10)  $\beta$ -Bisabolol, 11) Geraniol, 12)  $\alpha$ -Cadinol, 13)  $\alpha$ -Bisabolol, and \*) lavandulol.

**FIGURE S2.** GC chromatogram of assay products when IPP and DMAPP were incubated overnight with (a) soluble protein extracted from *E. coli* BL21(DE3) strains transformed with the empty pET41(b+) expression vector, and (b) in assay buffers without protein. Peaks correspond to: 1) IPP prenyl alcohol and 2) DMAPP prenyl alcohol.

**FIGURE S3.** Effects of temperature (a) and pH (b) on the activity of LiLPPS (n = 2; Error bars indicate standard deviation).
