# Supplementary material
Source: PubMed Central journal article supplement (PMC3585068)

**A**

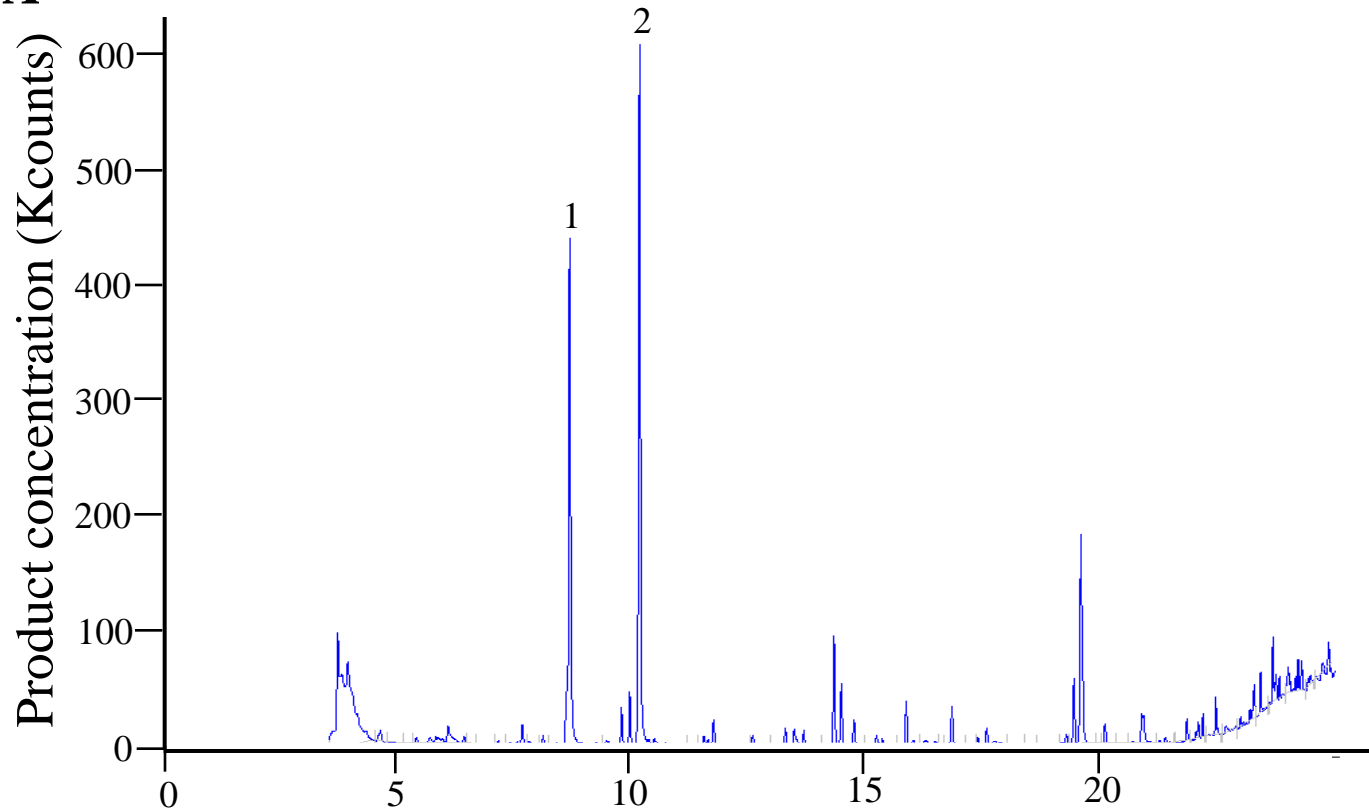

**B**

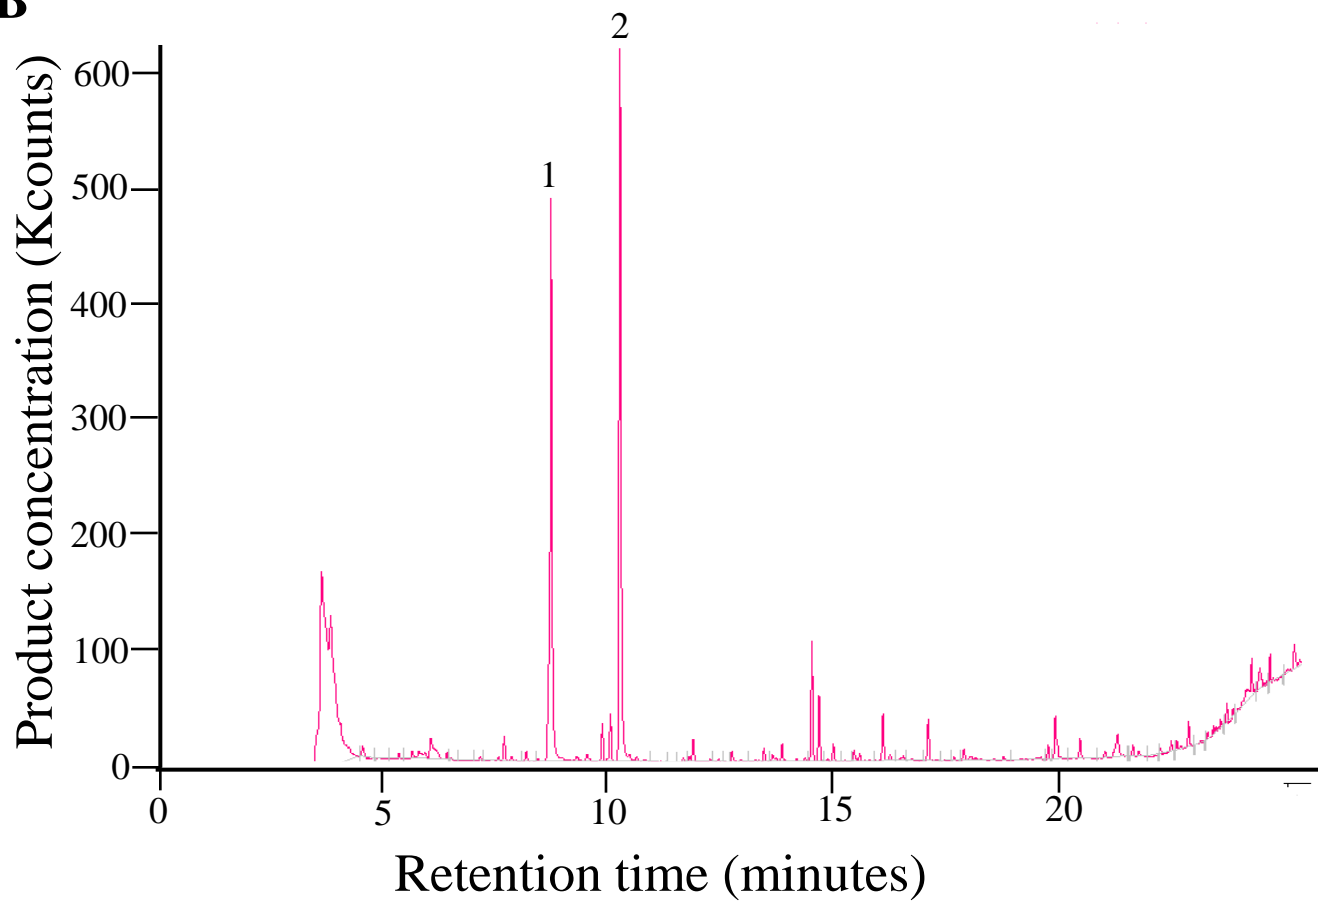

Supplement: supp_M112.431171_jbc.M112.431171-2.pdf [file supp_M112.431171_jbc.M112.431171-2.pdf]

**FIGURE S3**

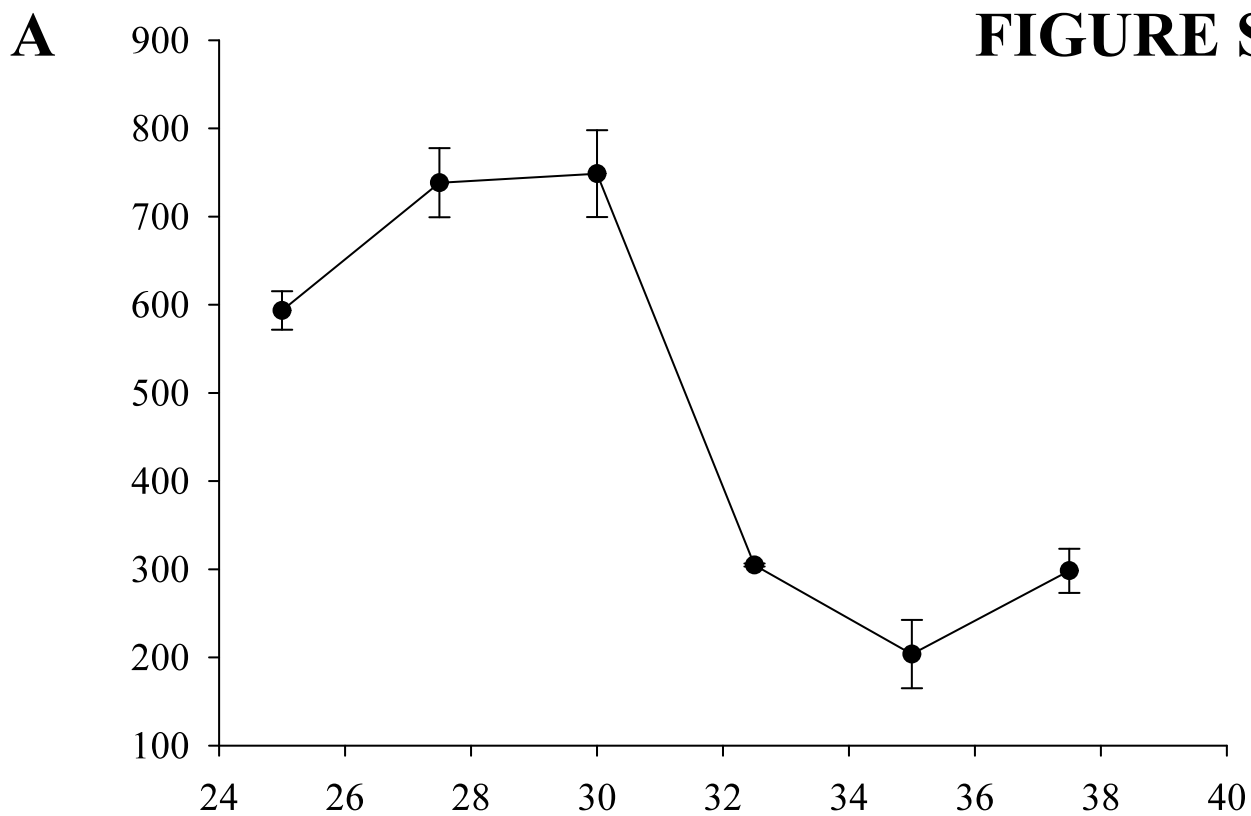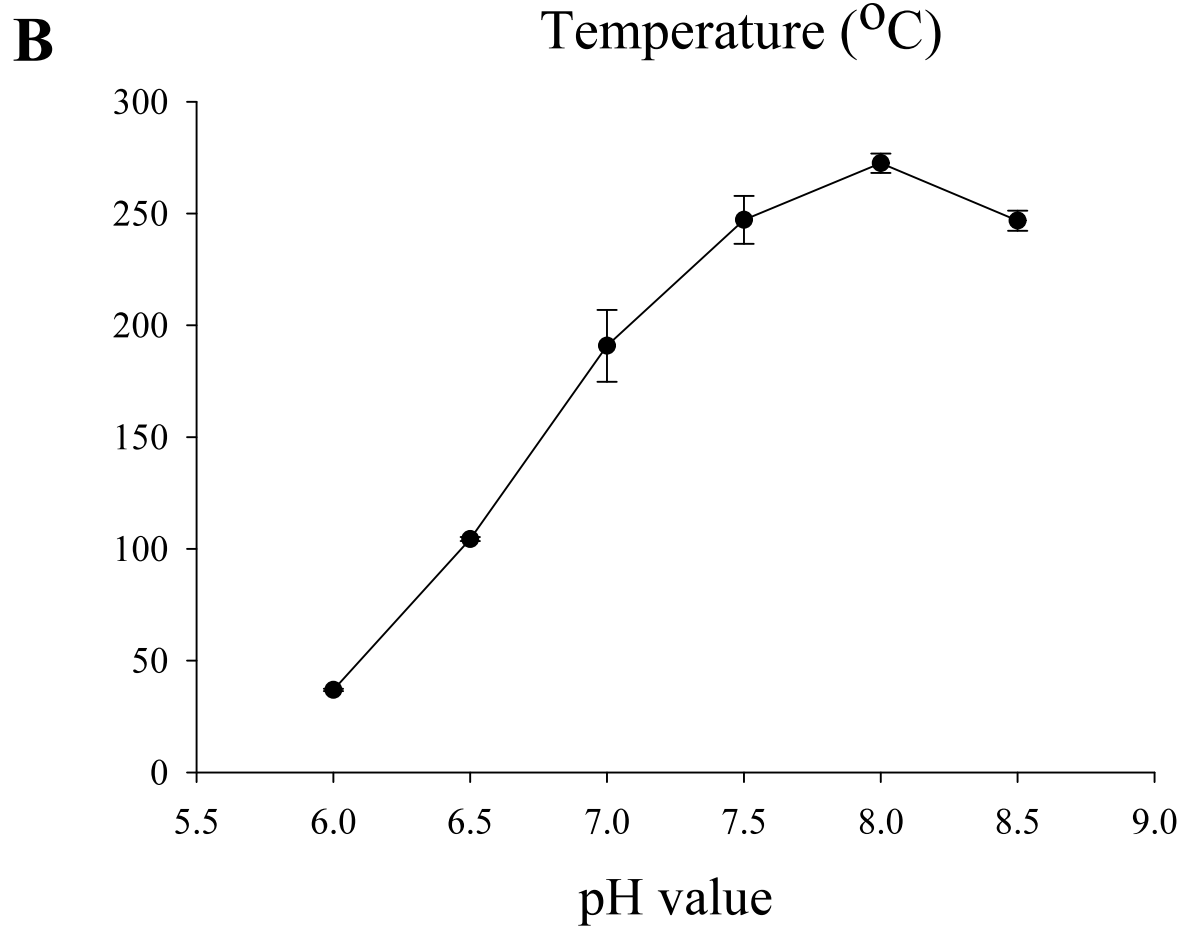

Supplement: supp_M112.431171_jbc.M112.431171-3.pdf [file supp_M112.431171_jbc.M112.431171-3.pdf]
